# Supplementary material for: Effect of Seawater Intrusion on the Formation of Chlorinated and Brominated Trihalomethanes in Coastal Groundwater
Source: MDPI journal article supplement (doi:10.3390/w14213579), 2022-11-07
Supplement: s1 [file s1]

Supplementary Material

# Effect of seawater intrusion on the formation of chlorinated and brominated trihalomethanes in coastal groundwater

Naseeba Parveen <sup>1</sup> and Sudha Goel <sup>1,2,\*</sup>

<sup>1</sup> School of Environmental Science and Engineering, Indian Institute of Technology Kharagpur, Kharagpur, West Bengal, India 721302

<sup>2</sup> Civil Engineering Department, Indian Institute of Technology Kharagpur, Kharagpur, West Bengal, India 721302

\* Correspondence: sudhagiitkgp@gmail.com; Tel.: +91-03222-283436

Table S1: Chemical composition of synthetic seawater as per ASTM D1141-98 [22].

| Compound                        | Concentration (g/L) |
|---------------------------------|---------------------|
| NaCl                            | 24.53               |
| MgCl <sub>2</sub>               | 5.20                |
| Na <sub>2</sub> SO <sub>4</sub> | 4.09                |
| CaCl <sub>2</sub>               | 1.16                |
| KCl                             | 0.695               |
| NaHCO <sub>3</sub>              | 0.201               |
| KBr                             | 0.101               |
| H <sub>3</sub> BO <sub>3</sub>  | 0.027               |
| SrCl <sub>2</sub>               | 0.025               |
| NaF                             | 0.003               |

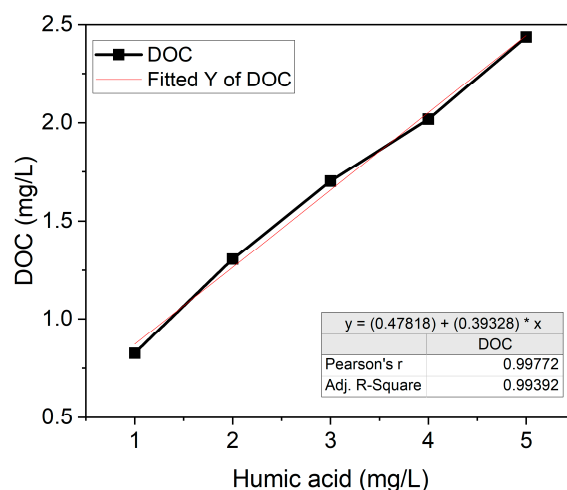

Figure S1. Dissolved organic carbon (DOC) for 1 – 5 mg/L of Humic acid concentration.

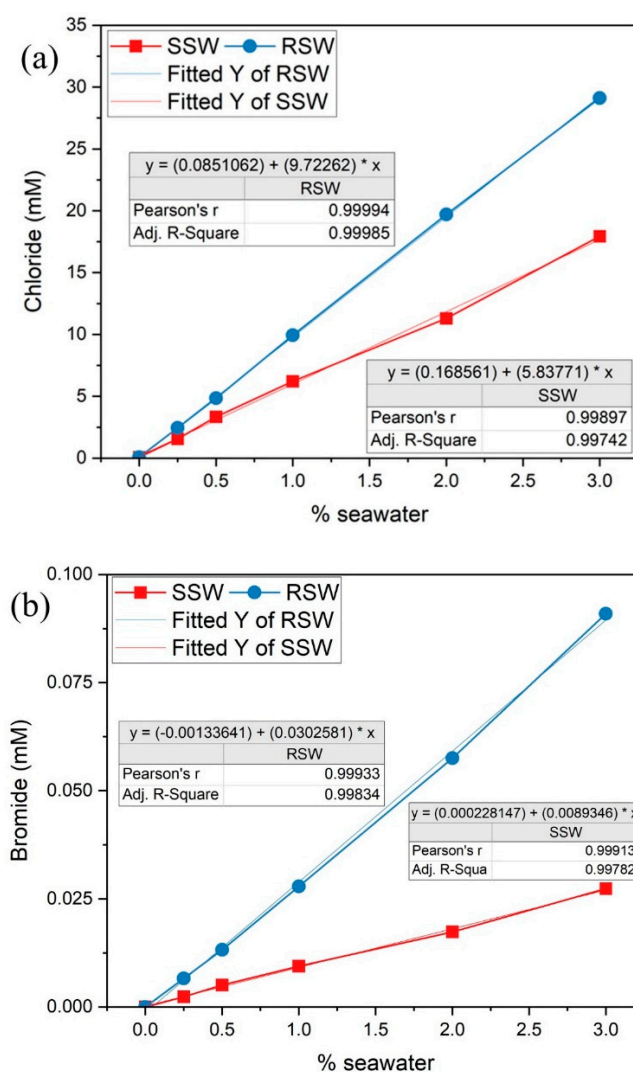

**Figure S2.** (a) Chloride and (b) bromide concentration at various seawater intrusion rates. SSW: synthetic seawater; RSW: real seawater

**Table S2.** Regression analysis results with regression model equation, coefficients, and ANOVA for chlorine demand, HA concentration, and SWI levels.

| Regression equation                                                                   |        |          |         |         |         |
|---------------------------------------------------------------------------------------|--------|----------|---------|---------|---------|
| $Chlorine\ demand\ (mg/L) = 0.004 + 0.448 \times SWI\ (\%) + 0.339 \times HA\ (mg/L)$ |        |          |         |         |         |
| Coefficients                                                                          |        |          |         |         |         |
| Term                                                                                  | Coef.  | SE Coef. | T-Value | P-Value |         |
| Constant                                                                              | 0.004  | 0.211    | 0.02    | 0.986   |         |
| SWI (%)                                                                               | 0.448  | 0.103    | 4.37    | 0.002   |         |
| HA (mg/L)                                                                             | 0.3391 | 0.0643   | 5.28    | 0.001   |         |
| Model summary                                                                         |        |          |         |         |         |
| R <sup>2</sup> = 0.84, S= 0.26                                                        |        |          |         |         |         |
| Analysis of variance                                                                  |        |          |         |         |         |
| Source                                                                                | DF     | SS       | MS      | F value | P value |

|             |    |       |       |       |       |
|-------------|----|-------|-------|-------|-------|
| Regression  | 2  | 3.328 | 1.66  | 23.38 | 0.000 |
| SWI         | 1  | 1.356 | 1.35  | 19.06 | 0.002 |
| HA          | 1  | 1.981 | 1.98  | 27.84 | 0.001 |
| Error       | 9  | 0.640 | 0.071 |       |       |
| Lack-of-fit | 8  | 0.640 | 0.080 |       |       |
| Pure Error  | 1  | 0.000 | 0.000 |       |       |
| Total       | 11 | 3.96  |       |       |       |

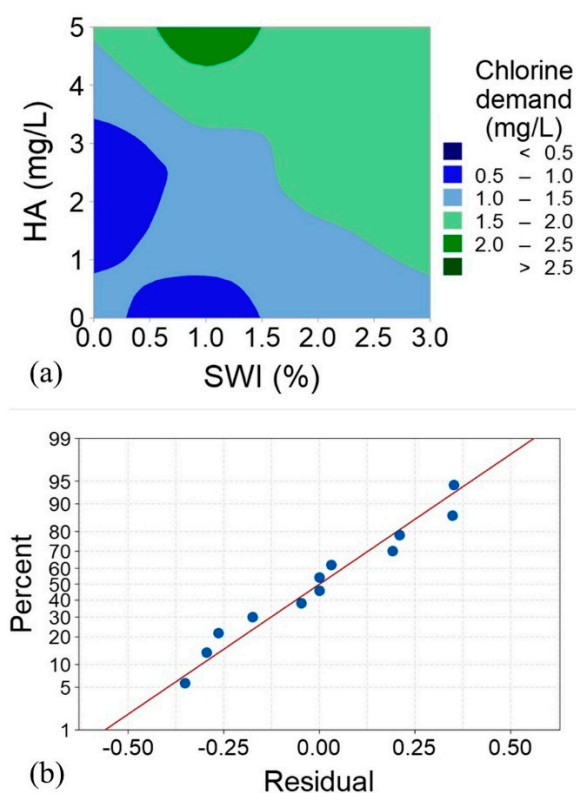

**Figure S3.** (a). Contour plot of chlorine demand with SWI levels and HA concentration and (b). normal probability plot (response is chlorine demand)

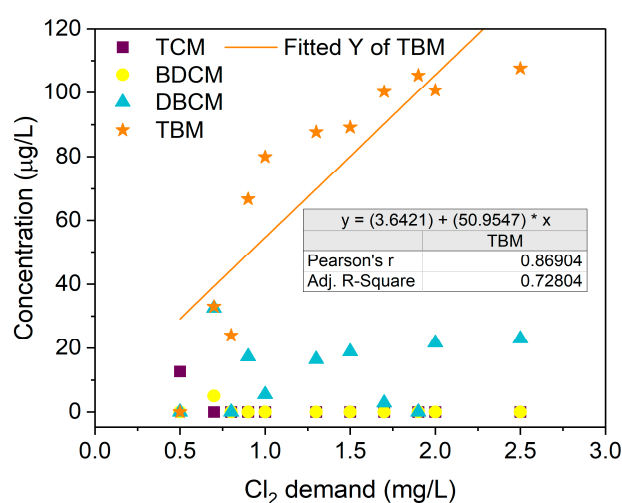

**Figure S4.** Effect of chlorine demand on speciation of THMs; TTHM: total THMs

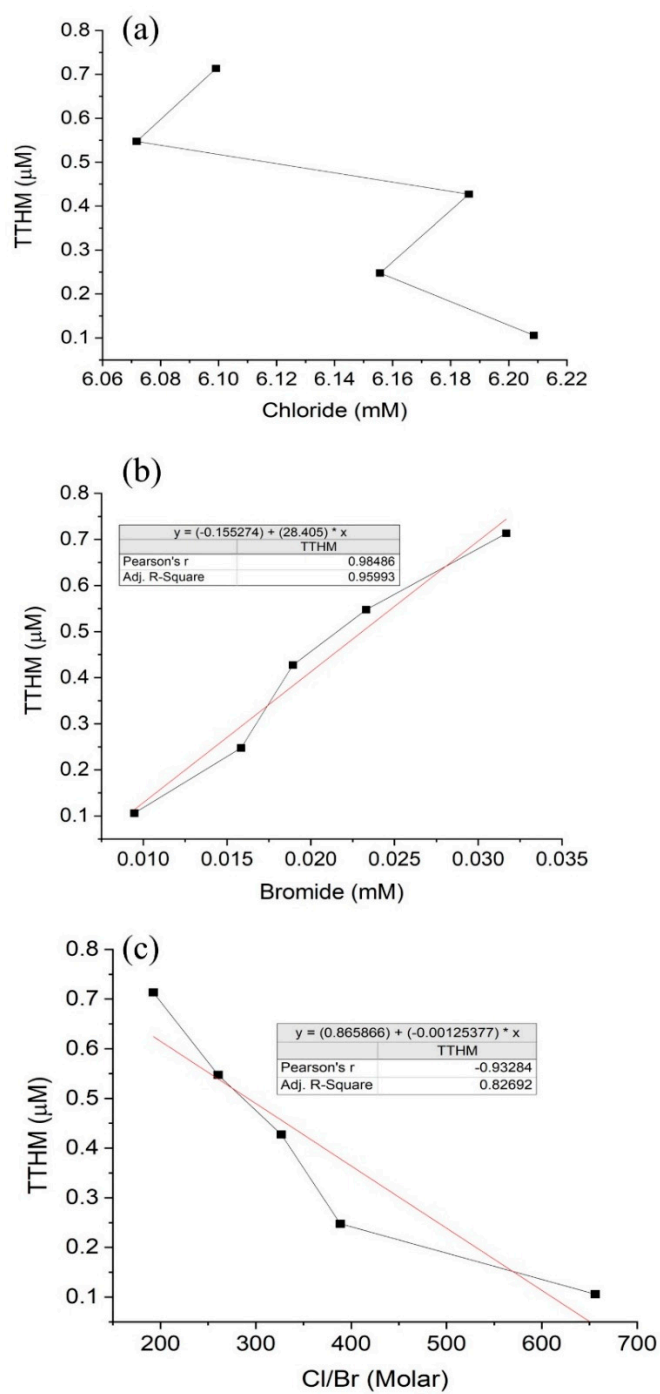

**Figure S5.** Change in total THMs (TTHMs) with increasing (a) chloride, (b) bromide, and (c) chloride-to-bromide ratio
